# Supplementary material for: Aging Population, Balanced Diet and China’s Grain Demand
Source: MDPI journal article supplement (doi:10.3390/nu15132877), 2023-06-25
Supplement: s1 [file s1]

# Aging Population, Balanced Diet and China's Grain Demand

## Supplementary Materials

**Table S1.** Other projections of China's GD

|                         | Methods/assumptions                                                                   | Predicted year | Population age structure | Urban-rural structure | Predicted China's GD (unit: million tons) |
|-------------------------|---------------------------------------------------------------------------------------|----------------|--------------------------|-----------------------|-------------------------------------------|
| Gao [73]                | regression method                                                                     | 2020           | No                       | no                    | 590                                       |
| Tang and Li [44]        | the per capita demand and the trend prediction method                                 | 2020           | No                       | no                    | 567                                       |
| Yuan <i>et al.</i> [70] | moving average method and standard person consumption ratio                           | 2020           | Yes                      | yes                   | 480                                       |
| Wang and Yu [74]        | autoregressive integrated moving average -generalized regression neural network model | 2020           | No                       | no                    | 741                                       |
| Zhang and Xu [66]       | Almost Ideal Demand System (AIDS) model                                               | 2020           | No                       | yes                   | 694                                       |
| Tang and Li [44]        | the per capita demand and the trend prediction method                                 | 2030           | No                       | yes                   | 586                                       |
| Yuan <i>et al.</i> [70] | moving average method and standard person consumption ratio                           | 2030           | Yes                      | yes                   | 560                                       |

**Table S2.** Food-to-grain conversion coefficient,  $coef_m$ , in existing literature and our estimates in this paper

| Literature                                    | Research region | Pork | Beef | Mutton | Poultry | Eggs | Milk and dairy products | Aquatic products |
|-----------------------------------------------|-----------------|------|------|--------|---------|------|-------------------------|------------------|
| Xin <i>et al.</i> [75]                        | China, province | 2.7  | 2.1  | 2.2    | 2.3     | 1.9  | 0.4                     | 1.0              |
| Chinese Academy of Agricultural Sciences [76] | China           | 3.0  | 1.9  | 1.9    | 2.15    | 1.65 | 0.36                    |                  |
| Ma and Niu [19]                               | China           | 3.00 | 2.00 | 2.00   | 2.00    | 2.00 | 0.33                    | 1.00             |
| Han <i>et al.</i> [77]                        | China           | 2.72 | 1.74 | 1.55   | 2.08    | 1.65 | 0.55                    | 0.44             |
| Meng [78]                                     | China           | 3.00 | 2.00 | 2.00   | 2.00    |      | 0.30                    | 0.80             |
| Chen [79]                                     | China           | 3.26 |      |        | 2.42    | 2.31 |                         | 0.95             |

|                         |          |      |      |      |      |      |      |      |
|-------------------------|----------|------|------|------|------|------|------|------|
| Wang [80]               | Province | 3.08 | 3.24 | 3.19 | 2.71 | 1.67 | 0.36 | 1.28 |
| Xie <i>et al.</i> [81]  | China    | 2.70 | 2.50 | 2.92 | 2.03 | 1.68 | 0.27 | 1.28 |
| Cao <i>et al.</i> [82]  | China    | 1.85 | 0.85 | 1.03 | 1.77 | 1.64 | 0.37 |      |
| Maximum                 |          | 3.26 | 3.24 | 3.19 | 2.71 | 2.31 | 0.55 | 1.28 |
| Minimum                 |          | 1.85 | 0.85 | 1.03 | 1.77 | 1.64 | 0.27 | 0.44 |
| Median                  |          | 3.00 | 2.00 | 2.00 | 2.08 | 1.68 | 0.36 | 1.00 |
| This paper ( $coef_m$ ) | China    | 2.77 | 2.15 | 2.41 | 2.56 | 1.66 | 0.38 | 0.90 |

To calculate the food-to-grain conversion coefficients, we first consider the feeding scale effect. We calculated the feed grain consumption coefficients of animal food  $m$  at feeding scale  $fs$  ( $coef_{fs,m}$ ) using equations (s1), where  $fgrain_{fs,m}$  is the feed grain consumption to produce animal food  $m$  at feeding scale  $fs$ ,  $p_{fs,m}$  is the “live weight” of animal food, and  $sr_m$  is the slaughter rate of animal food  $m$  (the ratio of the carcass weight after slaughter to the live weight). Then we compute the mean conversion coefficient,  $coef_m$  as the weighted average in equation (s2).  $w_{fs}$  is the proportion of different feeding scale  $fs$ .  $fs=1$  corresponds to scatter feeding (<30),  $fs=2$  corresponds to small-scale feeding (30-100), etc. as given in Table S6.

$$coef_{fs,m} = \frac{fgrain_{fs,m}}{p_{fs,m} * sr_m} \quad (s1)$$

$$coef_m = \sum_{fs} w_{fs} * coef_{fs,m} \quad (fs=1, 2, 3, 4) \quad (s2)$$

The data for  $fgrain_{fs,m}$  and  $p_{fs,m}$  are from the National Agricultural Product Revenue Compilation 2021 [62], the slaughter rates ( $sr_m$ ) of pig, cattle, mutton and broiler chicken were set at 0.7, 0.55, 0.47 and 0.7, respectively, using information in [75]. For laying chicken and cows that do not need to be slaughtered, we set the slaughter rate to be 1. The values of  $w_{fs}$  are in parenthesis in Table S6. In UCAS survey data, pork, beef, mutton and poultry were integrated into one category named livestock and poultry ( $j=2$ ) in Table 7. We estimate  $t_{2c}^t$  using equation (s3), as the weighted average value of  $coef_m$  of four kinds of meat, using the consumption of rural and urban residents as weights, and averaging over 2017-2019.

$$t_{2c}^t = (\frac{1}{3} * \sum_{t=2017}^{2019} \sum_m coef_m * rlp_m^t + \frac{1}{3} * \sum_{t=2017}^{2019} \sum_m coef_m * ulp_m^t) / 2 \quad (s3)$$

(when  $m \in \text{pork, beef, mutton, poultry}$ )

$$t_{jc}^t = coef_m \quad (\text{when } j \text{ and } m \neq \text{pork, beef, mutton, poultry}) \quad (s4)$$

In (s3),  $rlp_m^t$  and  $ulp_m^t$  are the consumption proportions of pork, beef, mutton and poultry (of their sum by weight) of rural and urban residents, respectively, in year  $t$ . The categories of aquatic products, eggs, milk and dairy in the UCAS survey are the same as those of classification in Table S2. We simply set  $t_{jc}^t = coef_m$  for types of food that are not livestock and poultry meat.

**Table S3.** The surveyed value of average food consumption,  $f_{ij}^t$ , in China in 2017 (Unit: g/ per capita per day)

| Age groups | Cereal, tubers<br>and beans | Eggs | Livestock and<br>poultry products | Aquatic prod-<br>ucts | Milk and dairy<br>products |
|------------|-----------------------------|------|-----------------------------------|-----------------------|----------------------------|
| 0-14       | 241.9                       | 48.4 | 96.3                              | 29.4                  | 65.1                       |
| 15-64      | 392.0                       | 59.1 | 150.4                             | 45.7                  | 20.5                       |
| >=65       | 363.2                       | 51.6 | 107.9                             | 32.5                  | 14.2                       |

**Table S4.** The estimated grain demand,  $gd_{ic}^t$ , in China in 2017 based on the survey of UCAS (Unit: g/ capita/ day)

| Age groups | Staple food grain | Feed grain | Food grain |
|------------|-------------------|------------|------------|
| 0-14       | 241.9             | 386.6      | 628.5      |
| 15-64      | 392.0             | 545.6      | 937.6      |
| >=65       | 363.2             | 406.1      | 769.3      |

**Table S5.** Estimated standard person consumption ratio,  $spcc_{ic}$ , in 2017

| Age groups | Staple food grain | Feed grain | Food grain |
|------------|-------------------|------------|------------|
| 0-14       | 0.62              | 0.71       | 0.67       |
| 15-64      | 1.00              | 1.00       | 1.00       |
| >=65       | 0.93              | 0.75       | 0.82       |

**Table S6.** Feeding scale structure of livestock and poultry in China

| Scale classification<br>(Proportion) | Feeding Scale structure            |                                   |                                         |                                            |
|--------------------------------------|------------------------------------|-----------------------------------|-----------------------------------------|--------------------------------------------|
|                                      | Scatter-feed-<br>ing<br>( $fs=1$ ) | Small-scale feeding<br>( $fs=2$ ) | Medium-scale feed-<br>ing<br>( $fs=3$ ) | Extensive-scale feed-<br>ing<br>( $fs=4$ ) |
| Pig                                  | <30<br>(0.566)                     | 30-100<br>(0.410)                 | 100-1000<br>(0.022)                     | >1000<br>(0.003)                           |
| Broiler chicken                      | <300<br>(0.148)                    | 300-1000<br>(0.345)               | 1000-10000<br>(0.501)                   | >10000<br>(0.007)                          |
| Laying chicken                       | <300<br>(0.580)                    | 300-1000<br>(0.393)               | 1000-10000<br>(0.024)                   | >10000<br>(0.004)                          |
| Cow                                  | <10<br>(0.910)                     | 10-50<br>(0.073)                  | 50-500<br>(0.015)                       | >500<br>(0.003)                            |
| Cattle                               | <50<br>(0.990)                     |                                   | >50<br>(0.010)                          |                                            |
| Lamb                                 | <100<br>(0.964)                    |                                   | >100<br>(0.036)                         |                                            |

Data source: Wind.

**Table S7.** The projected population in China for 2023-2025 (Unit:10000 persons)

| Year | $up_1^t$ | $up_2^t$ | $rp_1^t$ | $rp_2^t$ | $p^t$    |
|------|----------|----------|----------|----------|----------|
| 2023 | 48019.4  | 46280.6  | 23866.0  | 23001.7  | 141167.6 |
| 2024 | 48357.5  | 47191.0  | 23071.6  | 22515.1  | 141134.9 |
| 2025 | 48976.7  | 47795.3  | 22417.9  | 21877.2  | 141066.9 |

**Table S8.** Annual growth rate of grain demand and COVID-19 adjustment rates; rural and urban (  $rrgd_c^t, r\sigma_c^t, urgd_c^t, u\sigma_c^t$  )

|             | $rrgd_1^t$                                | $rrgd_2^t$ | $r\sigma_1^t$                                    | $r\sigma_2^t$ |
|-------------|-------------------------------------------|------------|--------------------------------------------------|---------------|
| Data source | the average growth speed during 2015-2019 |            | Lin <i>et al.</i> [59]; Zhong <i>et al.</i> [60] |               |
| 2022        | 0.62%                                     | 3.29%      | -1.00%                                           | -1.50%        |
| 2023        | 0.62%                                     | 3.29%      | -1.10%                                           | -1.30%        |
| 2024        | 0.62%                                     | 3.29%      | -0.60%                                           | -1.10%        |
| 2025        | 0.62%                                     | 3.29%      | -0.30%                                           | -0.80%        |
|             | $urgd_1^t$                                | $urgd_2^t$ | $u\sigma_1^t$                                    | $u\sigma_2^t$ |
| Data source | the average growth speed during 2015-2019 |            | Lin <i>et al.</i> [59]; Zhong <i>et al.</i> [60] |               |
| 2022        | 1.10%                                     | 1.9%       | -1.20%                                           | -1.40%        |
| 2023        | 1.10%                                     | 1.9%       | -1.30%                                           | -1.10%        |
| 2024        | 1.10%                                     | 1.9%       | -0.80%                                           | -0.90%        |
| 2025        | 1.10%                                     | 1.9%       | -0.50%                                           | -0.50%        |

**Table S9.** Estimated food grain demand per person; urban and rural (  $afgu_k^t, afg_r_k^t$  ) k=1 is male, k=2 is female (Unit: kg/year)

|                              | $afgu_1^t$ | $afgu_2^t$ | $afgr_1^t$ | $afgr_2^t$ |
|------------------------------|------------|------------|------------|------------|
| 2012 (Xin <i>et al</i> [18]) | 358.1      | 358.1      | 293.5      | 293.5      |
| 2017                         | 372.7      | 316.8      | 327.0      | 271.1      |
| 2018                         | 376.6      | 320.1      | 332.1      | 275.3      |
| 2019                         | 378.9      | 322.0      | 335.8      | 278.4      |
| 2020                         | 381.8      | 324.5      | 340.0      | 281.9      |
| 2021E                        | 382.5      | 325.1      | 342.4      | 283.8      |
| 2022E                        | 386.3      | 328.3      | 345.8      | 286.7      |
| 2023E                        | 390.5      | 331.9      | 349.8      | 290.0      |
| 2024E                        | 395.9      | 336.5      | 354.9      | 294.2      |
| 2025E                        | 402.7      | 342.3      | 361.3      | 299.5      |
|                              | $su_1^t$   | $su_2^t$   | $sr_1^t$   | $sr_2^t$   |
| 2022-2025E                   | 345.1      | 293.7      | 345.1      | 293.7      |
|                              | $afgu_1^t$ | $afgu_2^t$ | $afgr_1^t$ | $afgr_2^t$ |
| 2022-2025E                   | 303.4      | 303.4      | 303.4      | 303.4      |

**Table S10.** The data of  $ur^t, agr^t, uds^t$  and  $rds^t$ 

|         | 2013   | 2014   | 2015   | 2016   | 2017   | 2018   | 2019   | 2020   |
|---------|--------|--------|--------|--------|--------|--------|--------|--------|
| $ur^t$  | 0.5373 | 0.5477 | 0.561  | 0.5735 | 0.5852 | 0.5958 | 0.606  | 0.6399 |
| $agr^t$ | 0.0970 | 0.1010 | 0.1050 | 0.1080 | 0.1140 | 0.1190 | 0.1260 | 0.1350 |
| $uds^t$ | 0.1435 | 0.1439 | 0.1495 | 0.1506 | 0.1534 | 0.1635 | 0.1489 | 0.1335 |
| $rds^t$ | 0.0983 | 0.1029 | 0.1088 | 0.1079 | 0.1127 | 0.1332 | 0.1157 | 0.0936 |

Data Source: China Statistical Yearbook 2014-2021

**Table S11.** KMO-and-Bartlett's-Test results of  $rds^t$ ,  $agr^t$  and  $ur^t$  during 2013-2020

|                                  |                             |        |
|----------------------------------|-----------------------------|--------|
| KMO measure of sampling adequacy |                             | 0.491  |
| Bartlett Test of Sphericity      | chi – squared approximation | 21.901 |
|                                  | degree of freedom           | 3      |
|                                  | significance                | 0.000  |

**Table S12.** KMO-and-Bartlett's-Test results of  $uds^t$ ,  $agr^t$  and  $ur^t$  during 2013-2020

|                                  |                             |        |
|----------------------------------|-----------------------------|--------|
| KMO measure of sampling adequacy |                             | 0.510  |
| Bartlett Test of Sphericity      | chi – squared approximation | 21.751 |
|                                  | degree of freedom           | 3      |
|                                  | significance                | 0.000  |
